# Supplementary material
Source: PubMed Central journal article supplement (PMC5652593)
Supplement: DC171011SupplementaryData.pdf [file DC171011SupplementaryData.pdf]

SUPPLEMENTARY DATA

**Supplementary Table S1. Characteristics of cohort of patients with diabetes mellitus in the Mount Sinai Health System and Geisinger Replication Cohort, by SLGT-2 inhibitor use, prior to propensity matching.**

|                                      | Mount Sinai Cohort    |                       |        | Geisinger Cohort    |                     |        |
|--------------------------------------|-----------------------|-----------------------|--------|---------------------|---------------------|--------|
|                                      | User n = 388          | Non-User n = 12316    | P1     | User n = 2560       | Non User n = 53603  | P2     |
| <b>Demographics</b>                  |                       |                       |        |                     |                     |        |
| Age                                  | 63.0 [55.0 – 70.0]    | 69.0 [61.0 – 77.0]    | <0.001 | 58.0 (50.0-65.0)    | 63.0 (53.0-73.0)    | <0.001 |
| Male                                 | 219 (54.8)            | 6397 (51.9)           | 0.02   | 1406 (54.9)         | 26973 (50.3)        | <0.001 |
| <b>Race</b>                          |                       |                       | <0.001 |                     |                     | 0.14   |
| White                                | 170 (42.5)            | 3418 (27.8)           |        | 2459 (96.1)         | 51041 (95.2)        |        |
| Black                                | 71 (17.8)             | 3679 (29.9)           |        | 66 (2.6)            | 1737 (3.2)          |        |
| Other                                | 159 (39.8)            | 5211 (42.3)           |        | 35 (1.4)            | 825 (1.5)           |        |
| <b>Comorbidities</b>                 |                       |                       |        |                     |                     |        |
| Smoker (ever)                        | 40 (10.0)             | 3101 (34.9)           | <0.001 | 1348 (52.7)         | 29818 (55.9)        | <0.001 |
| Heart Failure                        | 63 (15.8)             | 3361 (27.3)           | <0.001 | 98 (3.8)            | 1797 (3.4)          | 0.19   |
| Coronary Artery Disease              | 138 (34.5)            | 5028 (40.8)           | 0.02   | 394 (15.4)          | 5589 (10.4)         | <0.001 |
| Hypertension                         | 362 (90.5)            | 11342 (92.1)          | 0.21   | 1434 (56.0)         | 29598 (55.2)        | 0.48   |
| Stroke                               | 23 (5.8)              | 1470 (11.9)           | <0.001 | 64 (2.5)            | 1113 (2.0)          | 0.14   |
| <b>Vital Signs</b>                   |                       |                       |        |                     |                     |        |
| Body Mass Index in kg/m <sup>2</sup> | 31.7 [28.1 - 36.8]    | 29.7 [26.1 - 34.3]    | <0.001 | 35.0 (30.6-40.3)    | 32.9 (28.7-38.2)    | <0.001 |
| Systolic Blood Pressure in mm of Hg  | 131.0 [123.3 – 141.6] | 134.0 [125.0 – 143.7] | <0.001 | 128.0 (119.0-138.0) | 128.0 (120.0-140.0) | 0.02   |
| Diastolic Blood Pressure in mm of Hg | 74.8 [70.0 – 80.0]    | 72.2 [67.7 - 77.2]    | <0.001 | 74.0 (68.0-80.0)    | 74.0 (68.0-80.0)    | 0.005  |
| <b>Lab Values</b>                    |                       |                       |        |                     |                     |        |
| Hemoglobin A1C in gm%                | 8.0 [7.3 - 9.0]       | 7.1 (6.4 - 8.2)       | <0.001 | 8.2 (7.4-9.3)       | 6.8 (6.2-7.7)       | <0.001 |
| Total cholesterol in mg/dL           | 161.0 [141.0 - 187.5] | 163.5 [139.2 – 191.3] | 0.78   | 164.0 (141.0-194.0) | 173.0 (148.0-204.0) | <0.001 |
| Hemoglobin in gm/dL                  | 13.2 (12.1 – 14.2)    | 12.1 (10.7 – 13.3)    | <0.001 | 14.0 (12.9-15.1)    | 13.6 (12.5-14.8)    | <0.001 |

## SUPPLEMENTARY DATA

|                                                                    |                       |                         |        |                      |                        |        |
|--------------------------------------------------------------------|-----------------------|-------------------------|--------|----------------------|------------------------|--------|
| Estimated Glomerular Filtration Rate in ml/min/1.73 m <sup>2</sup> | 63.7 [52.5 - 78.3]    | 54.6 [39.6 - 68.9]      | <0.001 | 90.3 (72.6 - 102.0)  | 79.8 (60.0- 95.4)      | <0.001 |
| <b>Medications</b>                                                 |                       |                         |        |                      |                        |        |
| Metformin                                                          | 356 (89.0)            | 7388 (60.0)             | <0.001 | 2149 (83.9)          | 11972 (22.3)           | <0.001 |
| Insulin                                                            | 270 (67.5)            | 8234 (66.9)             | 0.24   | 719 (28.1)           | 3082 (5.7)             | <0.001 |
| Renin Angiotensin System Blockers                                  | 157 (39.3)            | 9343 (75.9)             | 0.83   | 1631 (63.7)          | 14579 (27.2)           | <0.001 |
| Other Anti-Hypertensive                                            | 345 (86.3)            | 11515 (93.5)            | <0.001 | 1946 (76.0)          | 15814 (29.5)           | <0.001 |
| Diuretics                                                          | 165 (41.3)            | 7462 (60.6)             | <0.001 | 795 (31.1)           | 7269 (13.5)            | <0.001 |
| Non-Steroidal Anti Inflammatory Drugs                              | 4 (1.0)               | 281 (2.3)               | 0.07   | 816 (31.9)           | 5996 (11.2)            | <0.001 |
| <b>Outcomes</b>                                                    |                       |                         |        |                      |                        |        |
| AKI <sub>ICD</sub>                                                 | 22 (5.5)              | 2462 (20.0)             | <0.001 | 50 (2.0)             | 4678 (8.7)             | <0.001 |
| AKI <sub>KDIGO</sub> <sup>2</sup>                                  | 20 (5.2)              | 1304 (10.6)             | 0.001  | 82 (3.2)             | 6892 (12.9)            | <0.001 |
| Follow-Up in Days <sup>3</sup>                                     | 545.5 [336.5 – 778.5] | 1248.0 [861.0 - 1385.0] | <0.001 | 454.0 (221.0- 688.0) | 1501.0 (846.0- 1501.0) | <0.001 |

Continuous variables are recorded as median (IQR). Categorical variables are recorded as n (%).

P1 and P2 are P-values for primary and secondary analyses, respectively.

eGFR in (mL/min per 1.73m<sup>2</sup>) calculated by CKD-EPI equation.

Definitions:

1. AKI by ICD9/10 codes: codes 584.XX and ICD10 code N17.9.
2. AKI by KDIGO laboratory algorithm: increase in serum creatinine by  $\geq 0.3$  mg/dL within 48 hours, increase in serum creatinine to  $\geq 1.5$  times baseline known or presumed to have happened in prior 7 days.
3. In Geisinger, baseline was defined as outpatient mean serum creatinine, within a year to 7 days before admission when available, or the inpatient value within the prior 7 days. Follow-up in days defined as:
  - Users: Time from start of SGLT2 inhibitor prescription to last outpatient encounter
  - Non-users: Time from first outpatient visit occurring between 2013-2015 to last outpatient visit in 2016.
  - In Geisinger, Users: Time from start of SGLT2 inhibitor prescription to the first of event date or last observed date (Feb 10 2017) in our data.
  - Non-users: Start time is the date of first creatinine measure after 2013. End date as for users.
